# Supplementary material for: Light-promoted dual coking-elimination effects enable highly efficient photothermocatalytic dry reforming of methane on Ni/CeO 2 –Al 2 O 3
Source: Royal Society of Chemistry journal article supplement (doi:10.1039/d5ta08370b), 2025-11-24
Supplement: d5ta08370b1.pdf [file d5ta08370b1.pdf]

## Supporting Information

### **Light-promoted dual coking-elimination effects enable highly efficient photothermocatalytic dry reforming of methane on Ni/CeO<sub>2</sub>-Al<sub>2</sub>O<sub>3</sub>**

*Jia Guo, Lei Ji, Yuanzhi Li,\* and Yulu Zhang.*

State Key Laboratory of Silicate Materials for Architectures (Wuhan University of Technology), 122  
Luoshi Road, Wuhan 430070, P.R. China.

\*Corresponding author.

E-mail address: [liyuanzhi@whut.edu.cn](mailto:liyuanzhi@whut.edu.cn)

Jia Guo and Lei Ji contributed equally to the paper.

#### **Contents**

Supplementary Methods

*Experimental.*

1. *Characterization.*
2. *Photothermocatalytic test.*
3. *Isotope labeling.*
4. *Temperature-programmed desorption of CO<sub>2</sub> (CO<sub>2</sub>-TPD).*
5. *Photocatalytic tests.*
6. *Controlled catalytic tests.*
7. *CH<sub>4</sub> temperature programmed oxidation by pre-adsorbed CO<sub>2</sub> (CH<sub>4</sub>-TPO-CO<sub>2</sub>).*
8. *H<sub>2</sub>-TPR of pre-chemisorbed O<sub>2</sub> (H<sub>2</sub>-TPR-O<sub>2</sub>).*

Supplementary Figure S1-S6

Supplementary Scheme S1-S3

Supplementary Table S1-S2

## 1. Characterization.

X-ray diffraction (XRD) patterns of the sample were acquired on a RigakuDmax X-ray diffractometer equipped with Cu K $\alpha$  radiation. Transmission electron microscopy (TEM) images were recorded by a JEM-2100F machine. The composition of the samples was determined on an inductively coupled plasma/optical emission spectroscopy (ICP-OES, Optima 4300DV, PerkinElmer). Nitrogen physisorption measurements were conducted at -196 °C on an ASAP 2020 analyzer to determine the specific surface area and pore size distribution. Thermogravimetric/mass spectrometry (TG-MS) characterization was carried out by the STA449F3 thermal analyzer combined with a mass spectrometer. The Raman spectra were obtained on the LABRAN HR Evolution with excitation of the light source at 532 nm. Diffuse reflectance absorption spectra were acquired using a UV3600 spectrophotometer. Fourier transform infrared spectra (FTIR) were recorded on an infrared spectrometer (Nicolet 6700).

## 2. Photothermocatalytic test.

The experimental procedure for the photothermocatalytic dry reforming of methane (DRM) was as follows: a home-made stainless-steel reactor equipped with a quartz window was used. 0.009 g of the sample to be tested was weighed, placed inside, and sealed. A mixture of gases with a composition of 29.6/29.8/40.6 vol% CH<sub>4</sub>/CO<sub>2</sub>/Ar was continuously introduced into the reactor. The gas flow rate was controlled using a mass flow meter and accurately measured using a soap bubble meter (S49-31/MT). The mixed gas was introduced at a flow rate of 90.50 mL min<sup>-1</sup> into the reactor. A 500 W Xe lamp with emission across the whole solar spectra (200–2400 nm) was focused on the sample and turned on. The concentrations of reactants and products were analyzed using a GC-9560 gas chromatograph (GC) to evaluate the performance of the sample in the light-driven photothermocatalytic DRM. To investigate the influence of light wavelength on the light-driven photothermocatalytic DRM over the sample Ni/CeO<sub>2</sub>-Al<sub>2</sub>O<sub>3</sub>, long-wave filters with cutoff wavelengths of  $\lambda > 420$ , 560 or 690 nm were placed in front of the quartz window of the reactor during focused illumination. The power of the focused ultraviolet-visible-infrared (UV-vis-IR) illumination was 6154 mW, and the spot size on the sample, adjusted by a convex lens on the Xe lamp, was approximately 10 mm in diameter. Consequently, the intensity of the focused UV-vis-IR illumination was calculated to be 78.4 kW m<sup>-2</sup>.

(corresponding to a solar flux concentration ratio of 78.4). The power values for the focused visible-infrared (vis-IR) illumination with  $\lambda > 420$ , 560 and 690 nm were 5164, 4476, and 3555 mW, respectively. The concentrations of reactants and products were analyzed using a GC. The methodologies for light-driven photothermocatalytic DRM testing, the quantification of focused illumination power, the determination of sample surface temperatures under concentrated irradiation, the computation of light-to-fuel efficiency, and the gas chromatographic analysis have been comprehensively described in our prior publications.

### **3. Isotope labeling.**

Isotope labeling experiments on Ni/CeO<sub>2</sub>-Al<sub>2</sub>O<sub>3</sub> samples were carried out using a home-made stainless-steel reactor under UV-vis-IR spotlight illumination. The reactor was connected to the tubular FTIR unit in the room of the infrared spectrometer (Nicolet 6700) through a micropump. 0.009 g of the reduced Ni/CeO<sub>2</sub>-Al<sub>2</sub>O<sub>3</sub> sample was added to the reactor and the temperature was measured by a thermocouple in close contact with the sample. The gas line was purged with high-purity Ar (60 mL min<sup>-1</sup>, purified by a deoxygenation tube) for 30 min. After purging, the sample was reduced in a gas stream of 5 vol% H<sub>2</sub>, 95 vol% Ar (60 mL min<sup>-1</sup>, purified by a deoxygenation tube) under UV-vis-IR spotlight for 30 min. After cooling to 400 °C, the flow was switched to a flow of high purity Ar (60 mL min<sup>-1</sup>, purified by a tube of deoxidant) for removing H<sub>2</sub> adsorbed on the sample for 1 h at 400 °C. Once the pre-reduced sample was cooled to room temperature, the high-purity argon flow was halted, activating the mini-pump, and a gas mixture containing 10 mL of <sup>12</sup>C<sup>18</sup>O<sub>2</sub>, 20 mL of CH<sub>4</sub>, and 270 mL of Ar was introduced into the recirculating closed gas line, keeping the mixture to circulate through the system. The Ni/CeO<sub>2</sub>-Al<sub>2</sub>O<sub>3</sub> was continuously reacted under focused UV-vis-IR illumination, and the data was recorded by using the FTIR spectrometer. At the end of the experiment, keeping the original state unchanged. Once the chamber temperature has dropped to room temperature, perform a 60 min high-purity Ar purge. The sample was subjected to photothermal catalytic DRM experiments in the same way as described above, with the only difference that the gas <sup>12</sup>C<sup>18</sup>O<sub>2</sub> was replaced by <sup>12</sup>C<sup>16</sup>O<sub>2</sub>.

### **4. Temperature-programmed desorption of CO<sub>2</sub> (CO<sub>2</sub>-TPD).**

The CO<sub>2</sub>-TPD of Ni/CeO<sub>2</sub>-Al<sub>2</sub>O<sub>3</sub>, Ni/Al<sub>2</sub>O<sub>3</sub>, CeO<sub>2</sub>-Al<sub>2</sub>O<sub>3</sub> and Al<sub>2</sub>O<sub>3</sub> was examined using a

multifunctional adsorption instrument (TP-5080) under dark conditions. 0.025 g sample was placed in a quartz tube and heated at a rate of  $10\text{ }^{\circ}\text{C min}^{-1}$  to  $700\text{ }^{\circ}\text{C}$  in a flow of 5 vol%  $\text{H}_2/\text{Ar}$  ( $24\text{ mL min}^{-1}$ ) connected to a deoxidizer tube, and held at  $700\text{ }^{\circ}\text{C}$  for 60 min. After cooling to  $400\text{ }^{\circ}\text{C}$ , the gas flow was switched to high-purity He ( $24\text{ mL min}^{-1}$ , purified through the deoxidizer tube) and maintained at  $400\text{ }^{\circ}\text{C}$  for 60 min in to remove adsorbed  $\text{H}_2$ . When cooled to room temperature, the gas supply was switched to 10 vol%  $\text{CO}_2/\text{He}$  ( $24\text{ mL min}^{-1}$ ) for  $\text{CO}_2$  adsorption. The  $\text{CO}_2$  adsorption lasted for 30 min, and then switched back to high-purity He purified by the deoxidizer ( $24\text{ mL min}^{-1}$ ). After the baseline stabilized, the pre-adsorbed  $\text{CO}_2$  sample was heated to  $750\text{ }^{\circ}\text{C}$  at a rate of  $10\text{ }^{\circ}\text{C min}^{-1}$ , and the process curve was recorded using the TP-5080.

## **5. Photocatalytic tests.**

The DRM photocatalytic performance of  $\text{Ni/CeO}_2\text{-Al}_2\text{O}_3$  samples was tested using a homemade stainless-steel reactor at near room temperature. 0.009 g of  $\text{Ni/CeO}_2\text{-Al}_2\text{O}_3$  was taken into the reactor, which was placed in an ice-water bath to ensure that it was close to room temperature under Xe lamp irradiation, and the other steps were the same as those for the measurement of photothermal catalytic activity.

## **6. Controlled catalytic tests.**

DRM on  $\text{Ni/CeO}_2\text{-Al}_2\text{O}_3$  was conducted at various temperatures in the dark or focused illumination using a home-made quartz conical reactor. 0.009 g of the catalyst was pre-reduced with a 5 vol%  $\text{H}_2/\text{Ar}$  flow ( $30\text{ mL min}^{-1}$ ) at  $500\text{ }^{\circ}\text{C}$  for 30 min. Following pre-reduction, the 5 vol%  $\text{H}_2/\text{Ar}$  flow was switched to a 10/10/80 vol%  $\text{CH}_4/\text{CO}_2/\text{Ar}$  mixture, with the flow rate controlled at  $90\text{ mL min}^{-1}$ . The gas concentrations of reactants and products at various temperatures were recorded using a GC in the dark, under focused illumination, and light with wavelengths greater than 420 nm and 560 nm.

## **7. $\text{CH}_4$ temperature programmed oxidation by pre-adsorbed $\text{CO}_2$ ( $\text{CH}_4\text{-TPO-CO}_2$ ).**

$\text{CH}_4$  temperature-programmed oxidation by pre-adsorbed  $\text{CO}_2$  ( $\text{CH}_4\text{-TPO-CO}_2$ ) on the samples of  $\text{Ni/Al}_2\text{O}_3$  or  $\text{Ni/CeO}_2\text{-Al}_2\text{O}_3$  was conducted in the dark or under focused UV-vis-IR illumination using a home-made quartz conical reactor equipped with a heating device in a circulating air circuit. 0.009 g

of the Ni/Al<sub>2</sub>O<sub>3</sub> or Ni/CeO<sub>2</sub>-Al<sub>2</sub>O<sub>3</sub> sample was heated to 500 °C at a rate of 10 °C min<sup>-1</sup> and maintained at this temperature for 30 min in a reducing atmosphere of 5 vol% H<sub>2</sub>/Ar (50 mL min<sup>-1</sup>), which had been purified using a deoxidizing tube. After cooling to 400 °C, the 5 vol% H<sub>2</sub>/Ar flow was replaced with a flow of high-purity argon (50 mL min<sup>-1</sup>, also purified by a deoxidizing tube) to remove adsorbed hydrogen from the sample for 60 min at 400 °C. Once cooled to room temperature, the argon flow was switched to a flow of pure CO<sub>2</sub> (50 mL min<sup>-1</sup>) for 30 min to facilitate CO<sub>2</sub> adsorption. Subsequently, the CO<sub>2</sub> stream was replaced with a flow of high-purity argon (50 mL min<sup>-1</sup>, purified by a deoxidizing tube) to remove any free and physically adsorbed CO<sub>2</sub>. Finally, the samples, which had been pre-adsorbed with CO<sub>2</sub>, were subjected to reaction in the dark or under UV-vis-IR illumination within a circulating gas stream of a CH<sub>4</sub> mixture (20 mL CH<sub>4</sub> mixed with 280 mL of argon, purified by a deoxidizing tube) at a heating rate of 10 °C min<sup>-1</sup>. The FTIR spectra of the gas composition within the system were recorded throughout the process. After the CH<sub>4</sub>-TPO-CO<sub>2</sub> experiments, the used samples were mixed with KBr powder (1:40), pressed into a translucent state, and infrared light was allowed to pass through the samples, and then record the attenuated total reflectance (ATR) spectra of the sample.

#### **8. H<sub>2</sub>-TPR of pre-chemisorbed O<sub>2</sub> (H<sub>2</sub>-TPR-O<sub>2</sub>).**

H<sub>2</sub>-TPR-O<sub>2</sub> was using a quartz tube reactor which a quartz window attached its bottom and connecting with the TP-5080. 0.008g catalyst was put into the quartz was heated to 500 °C at a rate of 10 °C min<sup>-1</sup> with a 24 mL min<sup>-1</sup> 5 vol% H<sub>2</sub>/Ar flow and held at 500 °C for 1 h. Then, the temperature was lowered to 400 °C, and high-purity He was blown for 1 h to remove the adsorbed H<sub>2</sub>. After cooling to room temperature, the gas was switched to 5 vol% O<sub>2</sub>/He with a flow rate of 24 mL min<sup>-1</sup> and kept 30 min. Pre-treatment completed, the gas was switched to 5 vol% H<sub>2</sub>/Ar with a flow rate of 24 mL min<sup>-1</sup>. Once the airflow is stable, start the TPR program with paralleled UV-vis-IR illumination or in the dark.

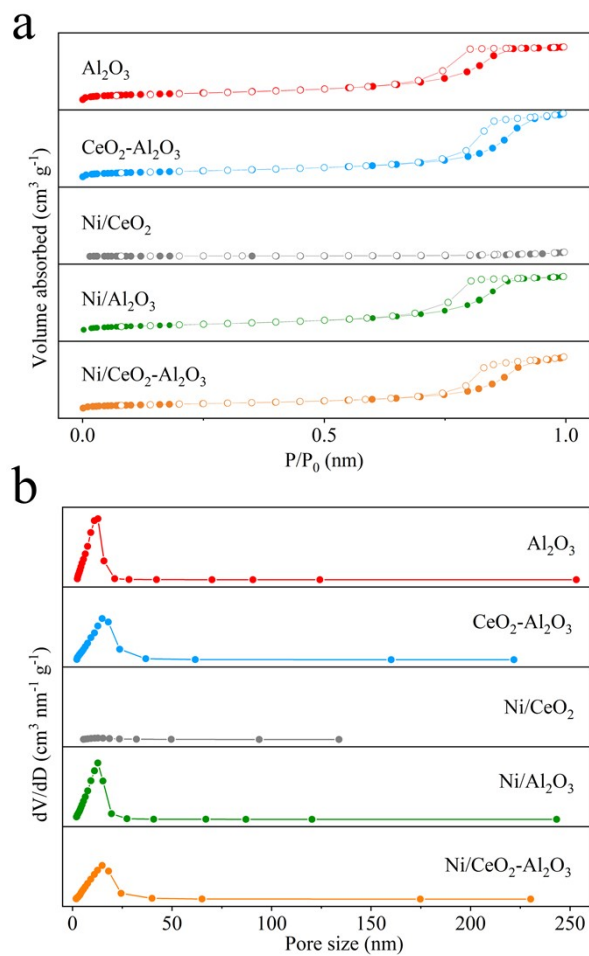

**Fig. S1** The  $\text{N}_2$  adsorption-desorption isotherms (a) and BJH adsorption pore size distributions (b) for  $\text{Ni/CeO}_2\text{-Al}_2\text{O}_3$ ,  $\text{Ni/Al}_2\text{O}_3$ ,  $\text{Ni/CeO}_2$ ,  $\text{CeO}_2\text{-Al}_2\text{O}_3$  and  $\text{Al}_2\text{O}_3$ .

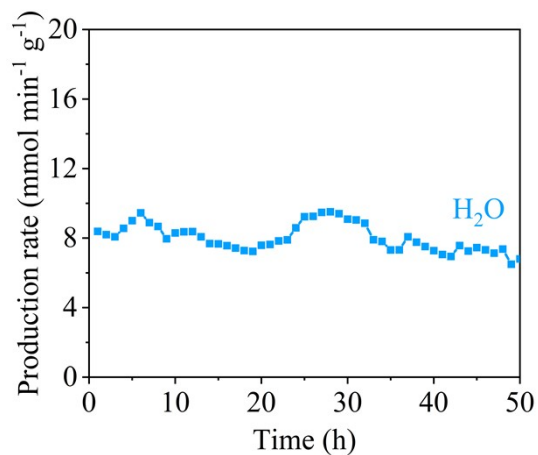

**Fig. S2** Time-dependent curves of  $r_{\text{H}_2\text{O}}$  during photothermocatalytic DRM on  $\text{Ni/CeO}_2\text{-Al}_2\text{O}_3$ .

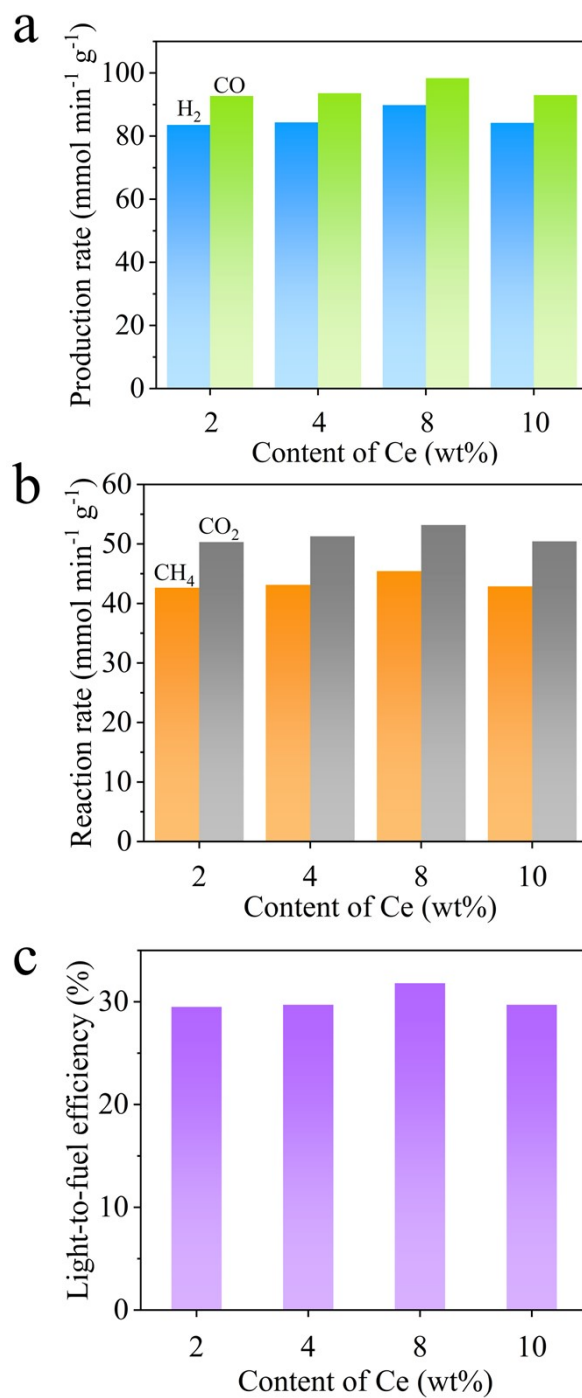

**Fig. S3** (a) The production rate of H<sub>2</sub> and CO, (b) the reaction rate of CH<sub>4</sub> and CO<sub>2</sub>, and (c) light-to-fuel efficiency of Ni/CeO<sub>2</sub>-Al<sub>2</sub>O<sub>3</sub> with different Ce contents under concentrated UV-vis-IR illumination.

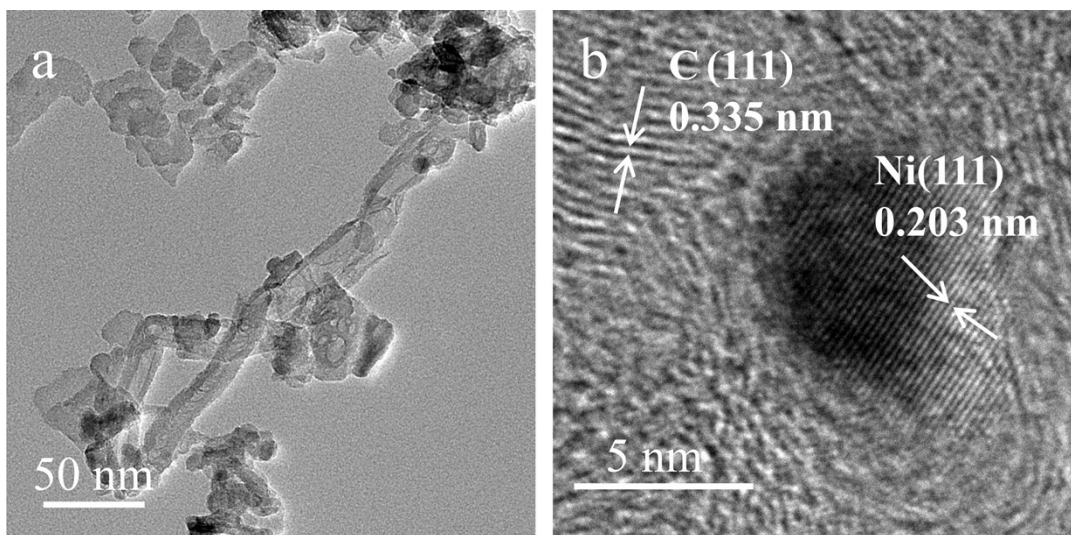

**Fig. S4** TEM (A) and HRTEM (B) images of the used Ni/CeO<sub>2</sub>-Al<sub>2</sub>O<sub>3</sub>.

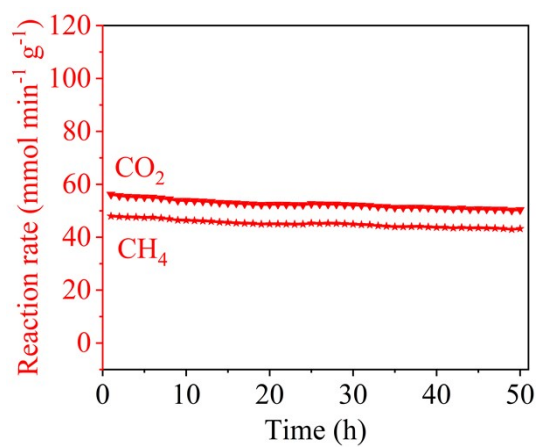

**Fig. S5** Time-dependent curves of  $r_{\text{CO}_2}$  and  $r_{\text{CH}_4}$  during photothermocatalytic DRM on Ni/CeO<sub>2</sub>-Al<sub>2</sub>O<sub>3</sub>.

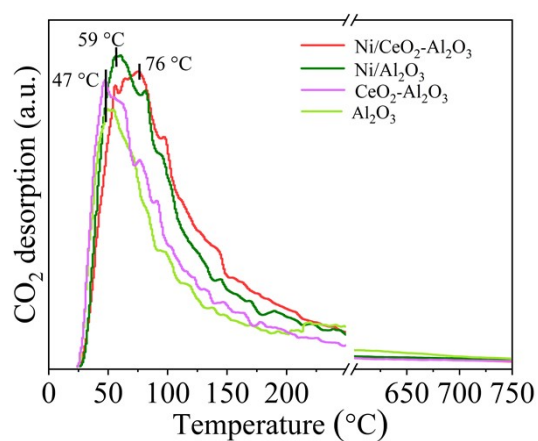

**Fig. S6** CO<sub>2</sub>-TPD profiles of Ni/CeO<sub>2</sub>-Al<sub>2</sub>O<sub>3</sub>, Ni/Al<sub>2</sub>O<sub>3</sub>, CeO<sub>2</sub>-Al<sub>2</sub>O<sub>3</sub> and Al<sub>2</sub>O<sub>3</sub> in the dark.



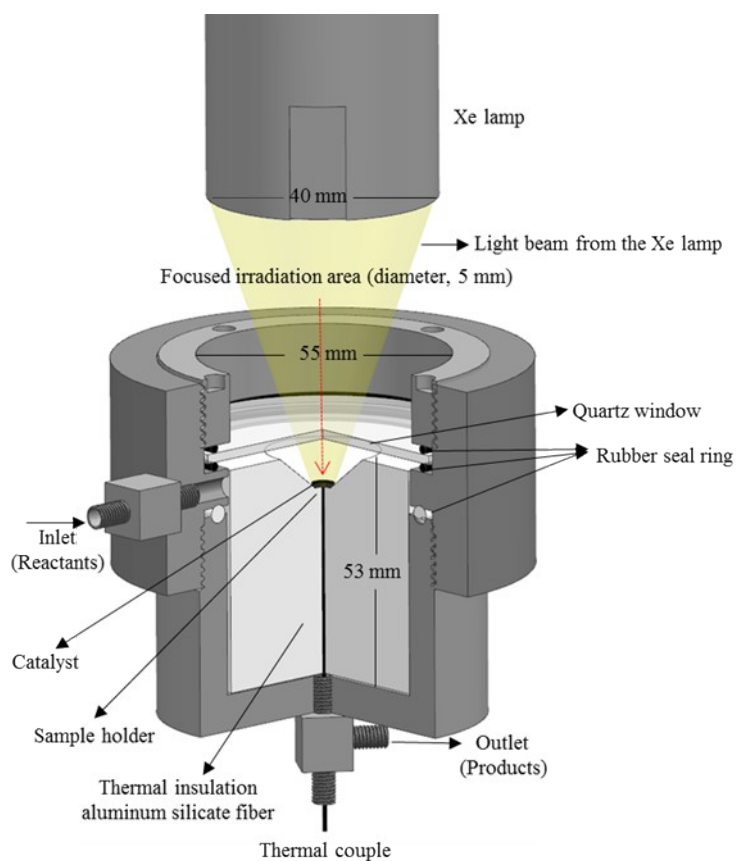

**Scheme S1** Schematic illustration of a home-made reactor for conducting photothermocatalytic CO<sub>2</sub> reduction by CH<sub>4</sub> on the samples under focused illumination from a 500 W Xe lamp without using additional electric heater.

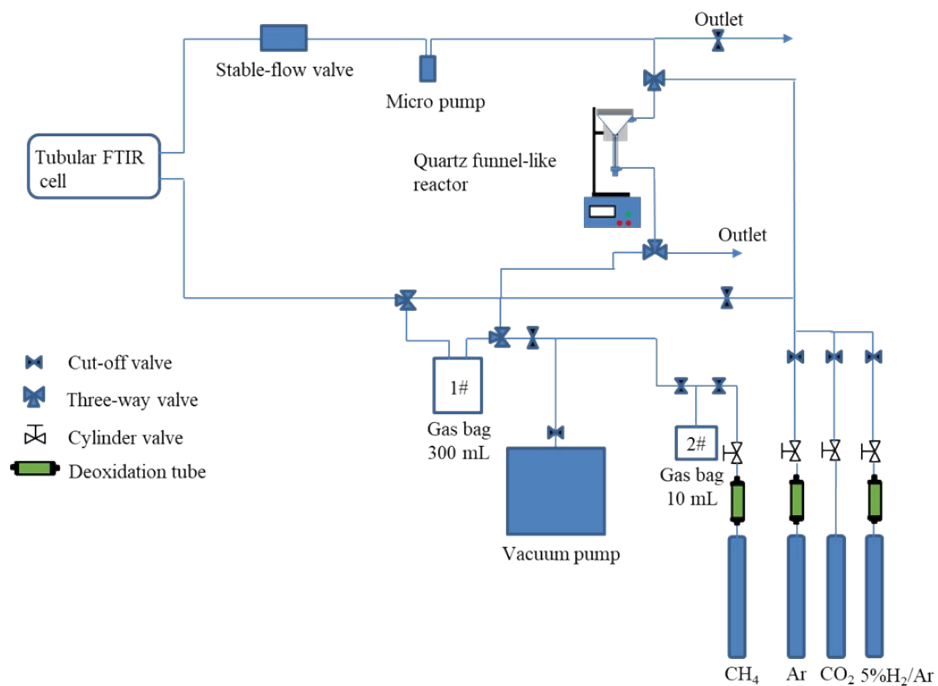

**Scheme S2** Set-up for temperature programmed CO<sub>2</sub> desorption and temperature programmed CH<sub>4</sub> oxidation by pre-adsorbed CO<sub>2</sub>.

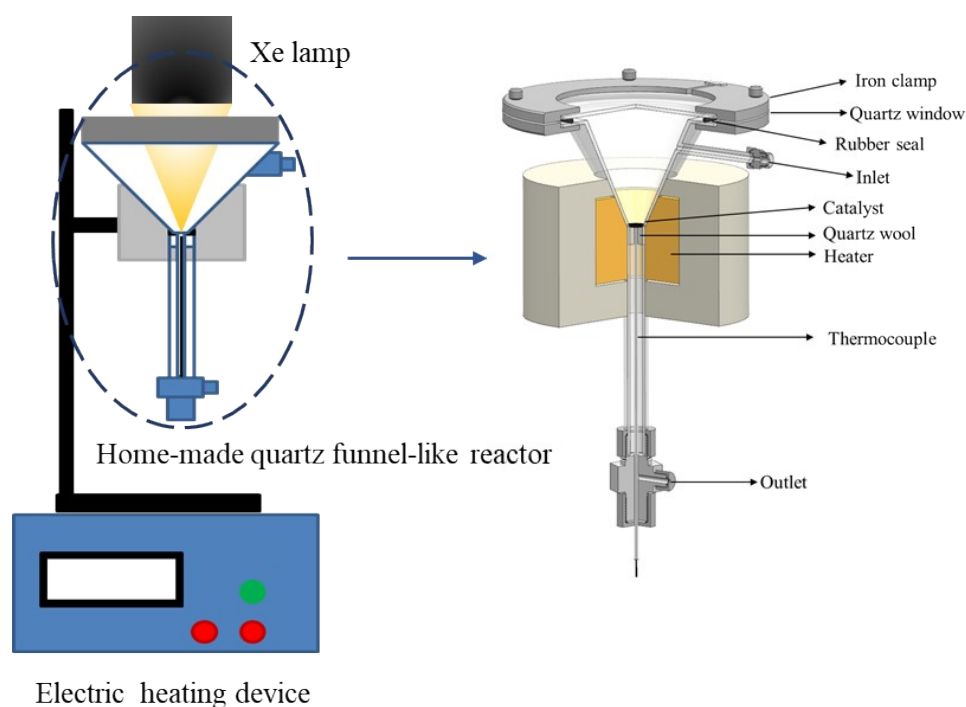

**Scheme S3** Schematic diagram of home-made quartz cylindro-conical reactor used in test of  $\text{CH}_4$  temperature programmed oxidation by pre-adsorbed  $\text{CO}_2$  in the dark and with concentrated UV-vis-IR illumination.

**Table S1** The texture structure of catalysts.

| sample                                  | Ni<br>(wt%) | Ce<br>(wt%) | Ni crystal<br>size (nm) | $\text{CeO}_2$<br>crystal<br>size (nm) | BET surface<br>area ( $\text{m}^2 \text{g}^{-1}$ ) | BJH absorption<br>volume ( $\text{cm}^3 \text{g}^{-1}$ ) |
|-----------------------------------------|-------------|-------------|-------------------------|----------------------------------------|----------------------------------------------------|----------------------------------------------------------|
| $\text{Ni/CeO}_2\text{-Al}_2\text{O}_3$ | 4.77        | 6.11        | 6.8                     | 8.0                                    | 94.6                                               | 0.36                                                     |
| $\text{Ni/Al}_2\text{O}_3$              | 4.86        | 0.00        | 6.2                     |                                        | 127.7                                              | 0.39                                                     |
| $\text{Ni/CeO}_2$                       | 4.90        | 77.41       | 17.8                    | 25.7                                   | 5.1                                                | 0.03                                                     |
| $\text{CeO}_2\text{-Al}_2\text{O}_3$    |             |             |                         | 8.3                                    | 117.6                                              | 0.45                                                     |
| $\text{Al}_2\text{O}_3$                 |             |             |                         |                                        | 129.1                                              | 0.38                                                     |

**Table S2** Comparison of photothermocatalytic DRM activity of various catalysts.

| Catalyst                                            | Feed composition                                            | Light intensity<br>(kW m <sup>-2</sup> ) | H <sub>2</sub> production<br>rate (mmol<br>g <sup>-1</sup> min <sup>-1</sup> ) | Light-to-fuel<br>efficiency<br>(%) | Coke deposition<br>rates<br>(g <sub>C</sub> ·g <sup>-1</sup> <sub>catalyst</sub> ·h <sup>-1</sup> ) | Reference |
|-----------------------------------------------------|-------------------------------------------------------------|------------------------------------------|--------------------------------------------------------------------------------|------------------------------------|-----------------------------------------------------------------------------------------------------|-----------|
| Ni/CeO <sub>2</sub> -Al <sub>2</sub> O <sub>3</sub> | 30/30/40 vol%<br>CH <sub>4</sub> /CO <sub>2</sub> /Ar       | 78.4                                     | 94.61                                                                          | 33.5                               | 1.75× 10 <sup>-3</sup>                                                                              | This work |
| Ni-CeO <sub>2</sub> /SiO <sub>2</sub>               | 29.5/30/40.5 vol%<br>CH <sub>4</sub> /CO <sub>2</sub> /Ar   | 385.2                                    | 33.42                                                                          | 27.4                               | 1.25× 10 <sup>-2</sup>                                                                              | 56        |
| Ni/CeO <sub>2</sub>                                 | 9.8/10/80.2 vol%<br>CH <sub>4</sub> /CO <sub>2</sub> /Ar    | 363.4                                    | 6.53                                                                           | 11.0                               | 1.25× 10 <sup>-2</sup>                                                                              | 63        |
| Ni-La <sub>2</sub> O <sub>3</sub> /SiO <sub>2</sub> | 19.9/20/60.1 vol%<br>CH <sub>4</sub> /CO <sub>2</sub> /Ar   | 410.9                                    | 38.11                                                                          | 20.3                               | 3.75× 10 <sup>-3</sup>                                                                              | 42        |
| Pt/CeO <sub>2</sub> -MNR                            | 10.2/10.2/79.6 vol%<br>CH <sub>4</sub> /CO <sub>2</sub> /Ar | 371.1                                    | 5.70                                                                           | 10.6                               |                                                                                                     | 33        |
| Ru/CeO <sub>2</sub>                                 | 28.5/29.7/41.8 vol%<br>CH <sub>4</sub> /CO <sub>2</sub> /Ar | 354.2                                    | 57.37                                                                          | 26.6                               | 5.26× 10 <sup>-5</sup>                                                                              | 32        |
| SCM-Ni/SiO <sub>2</sub>                             | 11.7/11.5/76.8 vol%<br>CH <sub>4</sub> /CO <sub>2</sub> /Ar | 343.6                                    | 17.10                                                                          | 12.5                               | 3.93 × 10 <sup>-6</sup>                                                                             | 39        |
| Ni/Ni-Al <sub>2</sub> O <sub>3</sub>                | 19.4/19.3/61.3 vol%<br>CH <sub>4</sub> /CO <sub>2</sub> /Ar | 333.8                                    | 27.02                                                                          | 19.9                               | 1.70× 10 <sup>-2</sup>                                                                              | 38        |
| 5% Ni AMOMs EG                                      | 48/48/4 vol%<br>CH <sub>4</sub> /CO <sub>2</sub> /Ar        | 37                                       | 38.57                                                                          | 24.0                               |                                                                                                     | 19        |
